# Supplementary material
Source: HighWire-hosted journal article supplement (https://www.cmaj.ca/highwire/filestream/150080/field_highwire_adjunct_files/2/230542-res-11-at.pdf)
Supplement: 230542-res-11-at.pdf [file 230542-res-11-at.pdf]

## Appendix 11: Spaghetti plots for pain and disability (individual cohorts)

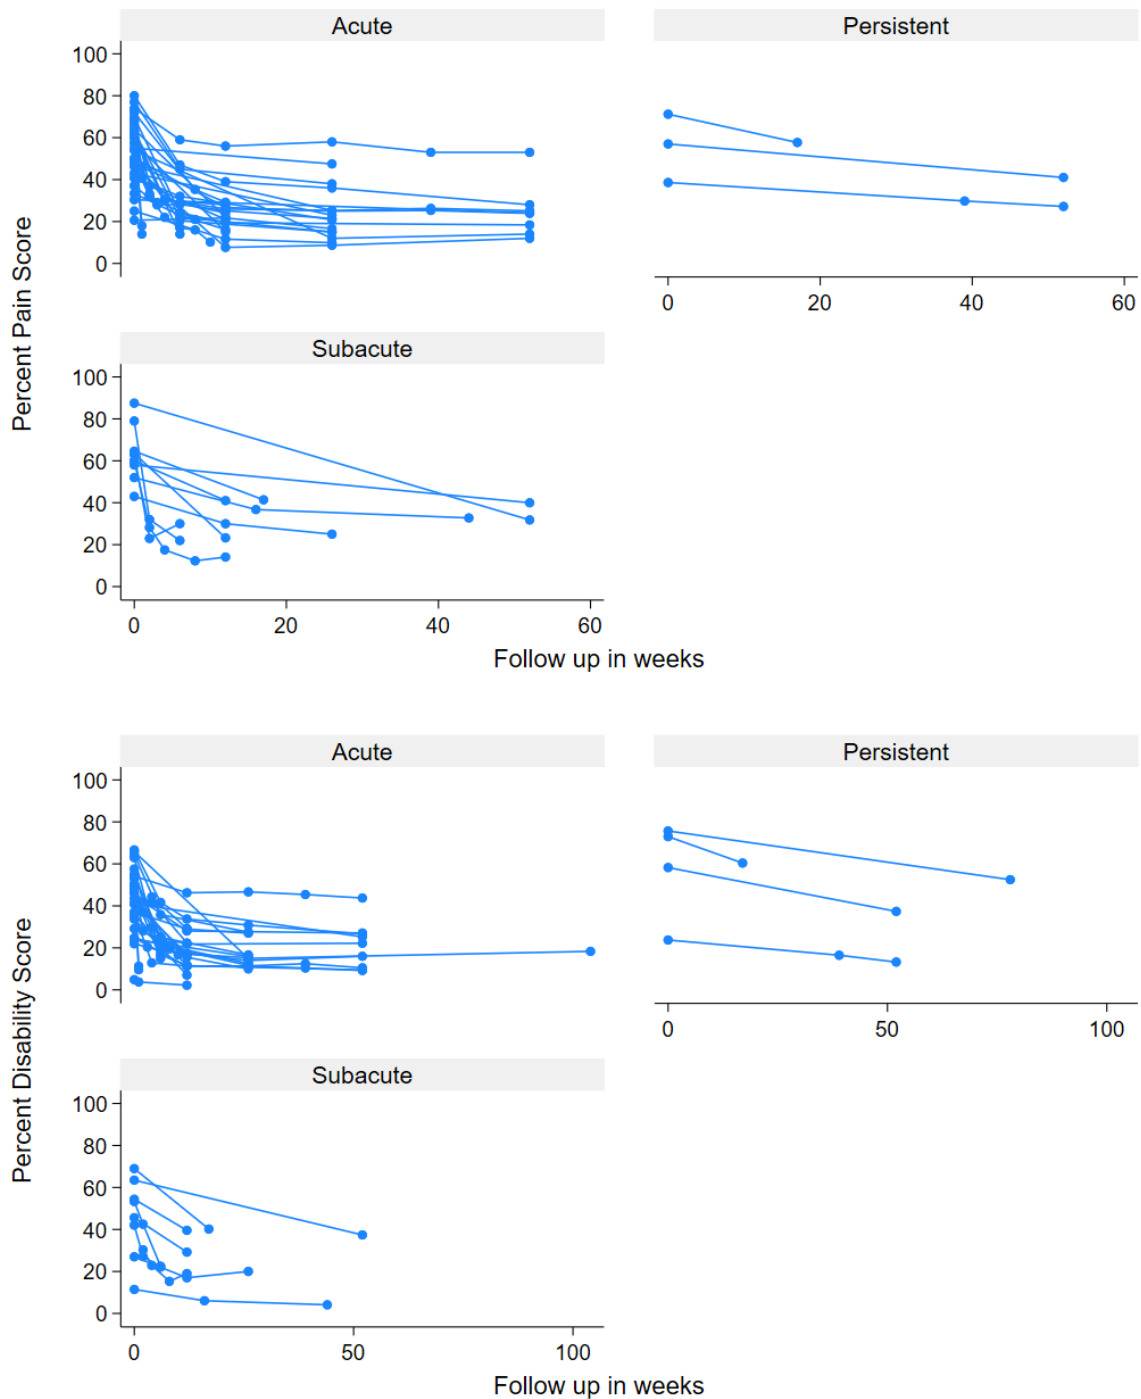

**Figure.** Spaghetti plots showing mean outcomes for pain (top graphs) and disability (bottom graphs) for each patient group.
